# Supplementary material for: High activity of aluminated bifunctional mesoporous silica nanoparticles for cumene hydrocracking and measurement of molar absorption coefficient
Source: Royal Society of Chemistry journal article supplement (doi:10.1039/c5nj01433f), 2015-01-01
Supplement: c5nj01433f1.pdf [file c5nj01433f1.pdf]

Appendix 1:

FESEM-EDX of Pt/HAIMSN-20:

Title : IMG1  
 -----  
 Instrument : 6701F  
 Volt : 15.00 kV  
 Mag. : x 11,000  
 Date : 2011/04/27  
 Pixel : 512 x 384

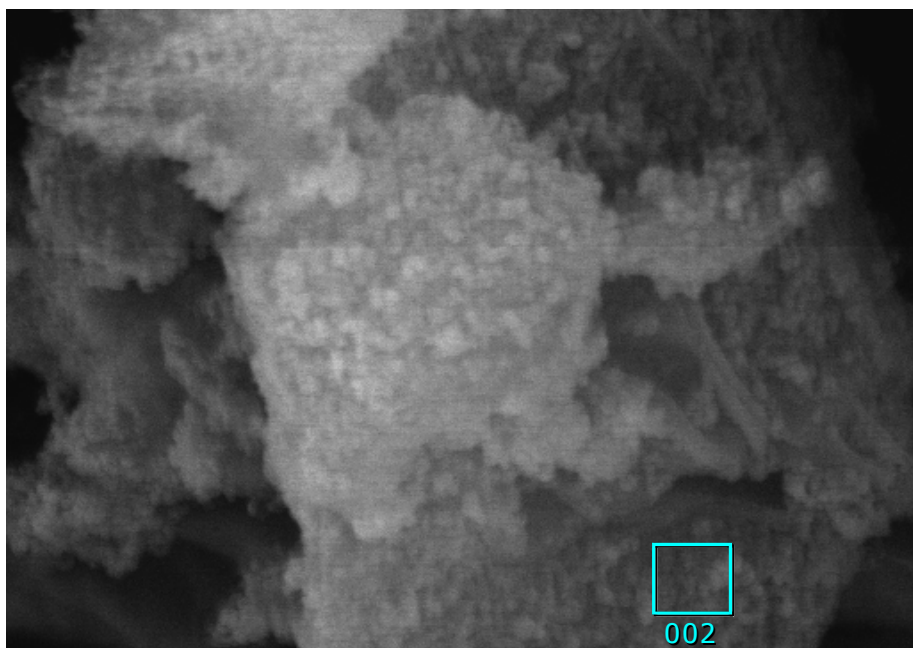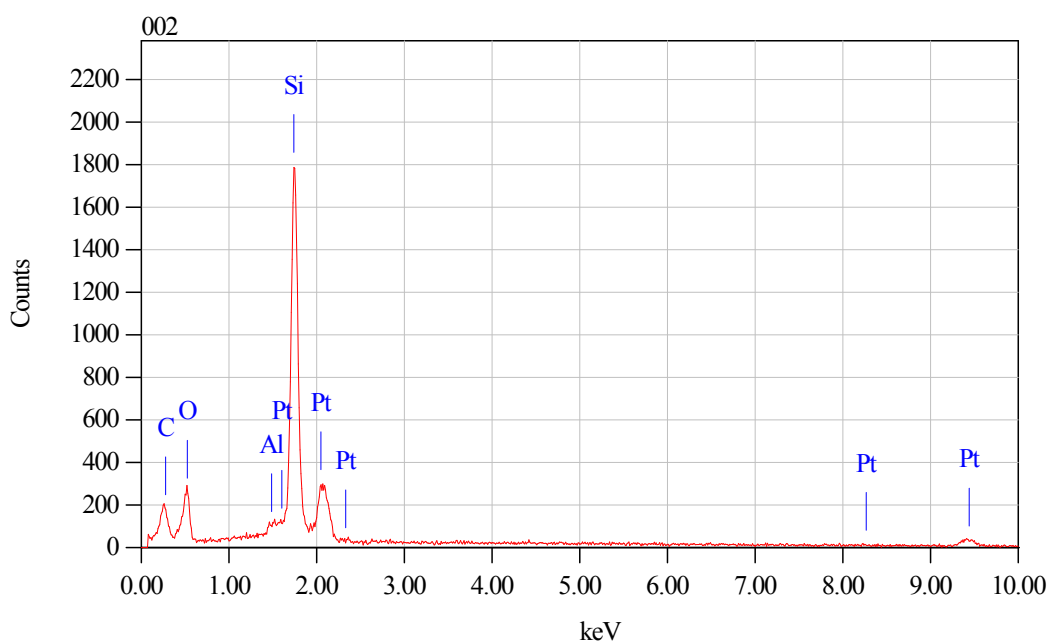

Acquisition Parameter  
 Instrument : 6701F  
 Acc. Voltage : 15.0 kV  
 Probe Current : 2.56160 nA  
 PHA mode : T4  
 Real Time : 57.10 sec  
 Live Time : 50.00 sec  
 Dead Time : 12 %  
 Counting Rate : 1292 cps  
 Energy Range : 0 - 20 keV

ZAF Method Standardless Quantitative Analysis

Fitting Coefficient : 0.2668

| Element | (keV) | Mass%  | Error% | Atom%  | Compound | Mass% | Cation | K       |
|---------|-------|--------|--------|--------|----------|-------|--------|---------|
| C K     | 0.277 | 21.07  | 0.14   | 41.44  |          |       |        | 4.6298  |
| O K     | 0.525 | 16.35  | 0.18   | 24.13  |          |       |        | 16.3548 |
| Al K    | 1.486 | 0.51   | 0.08   | 0.45   |          |       |        | 0.7214  |
| Si K    | 1.739 | 36.77  | 0.09   | 30.92  |          |       |        | 58.0235 |
| Pt M    | 2.048 | 25.30  | 0.44   | 3.06   |          |       |        | 24.3969 |
| Total   |       | 100.00 |        | 100.00 |          |       |        |         |
