# Supplementary material for: High activity of aluminated bifunctional mesoporous silica nanoparticles for cumene hydrocracking and measurement of molar absorption coefficient
Source: Royal Society of Chemistry journal article supplement (doi:10.1039/c5nj01433f), 2015-01-01
Supplement: c5nj01433f2.pdf [file c5nj01433f2.pdf]

Appendix 2:

XRF analysis of the Pt/HAIMSN catalysts:

Samples 1, 2, 3 and 4 are Pt/HAIMSN with Si/Al of 7, 10, 20 and 50, respectively.

|                                                                                   |         |                                              |         |         |
|-----------------------------------------------------------------------------------|---------|----------------------------------------------|---------|---------|
|  |         |                                              |         |         |
| Ministry of Industries<br>and Mines                                               |         | GEOLOGICAL SURVEY OF IRAN                    |         |         |
|                                                                                   |         | Date: _____<br>No: _____<br>Ref: _____       |         |         |
| Mineralogy Department<br>XRF Lab                                                  |         |                                              |         |         |
| Requester :Mr.Mohammad Reza Sazegar                                               |         |                                              |         |         |
| Report.No:92-1985                                                                 |         | Code NO:92-1645<br>Data of report:1-Feb-2014 |         |         |
| Semi Quantitative Analysis                                                        |         |                                              |         |         |
| LAB. NO:                                                                          | 2112    | 2113                                         | 2114    | 2115    |
| Field NO:                                                                         | 1       | 2                                            | 3       | 4       |
| Formula                                                                           | Conc. % | Conc. %                                      | Conc. % | Conc. % |
| Na <sub>2</sub> O                                                                 | 1.02    | 0.84                                         | 0.63    | 0.65    |
| Al <sub>2</sub> O <sub>3</sub>                                                    | 26.55   | 13.47                                        | 8.85    | 4.43    |
| SiO <sub>2</sub>                                                                  | 72.30   | 85.58                                        | 90.40   | 94.82   |
| Pt                                                                                | 0.11    | 0.10                                         | 0.11    | 0.09    |

Azadi Sq .Meraj Blvd.Tehran , Iran  
P.O .Box: 13185 - 1494  
Tel: +9821 6041981-9  
Fax:+9821 6009338  
E-mail:info@gsi.org.ir  
Web Site: <http://www.gsi.org.ir>
